# Supplementary material for: Freestanding flexible, pure and composite form of reduced graphene oxide paper for ammonia vapor sensing
Source: PubMed Central journal article supplement (PMC6584526; doi:10.1038/s41598-019-45408-4), 2019-06-19
Supplement: 41598_2019_45408_MOESM1_ESM.pdf [file 41598_2019_45408_MOESM1_ESM.pdf]

Supplementary Information

**Freestanding flexible, pure and composite form of reduced graphene oxide paper for ammonia vapor sensing**

D. Selvakumar<sup>a</sup>, H. Sivaram<sup>a</sup>, A. Alsalmeh<sup>b</sup>, A. Alghamdi<sup>b</sup>, R. Jayavel<sup>a,\*</sup>

<sup>a</sup> Centre for Nanoscience and Technology, Anna University, Chennai – 600025, India.

<sup>b</sup> Department of Chemistry, College of Science, King Saud University, P.O. Box 2455, Riyadh 11451, Saudi Arabia.

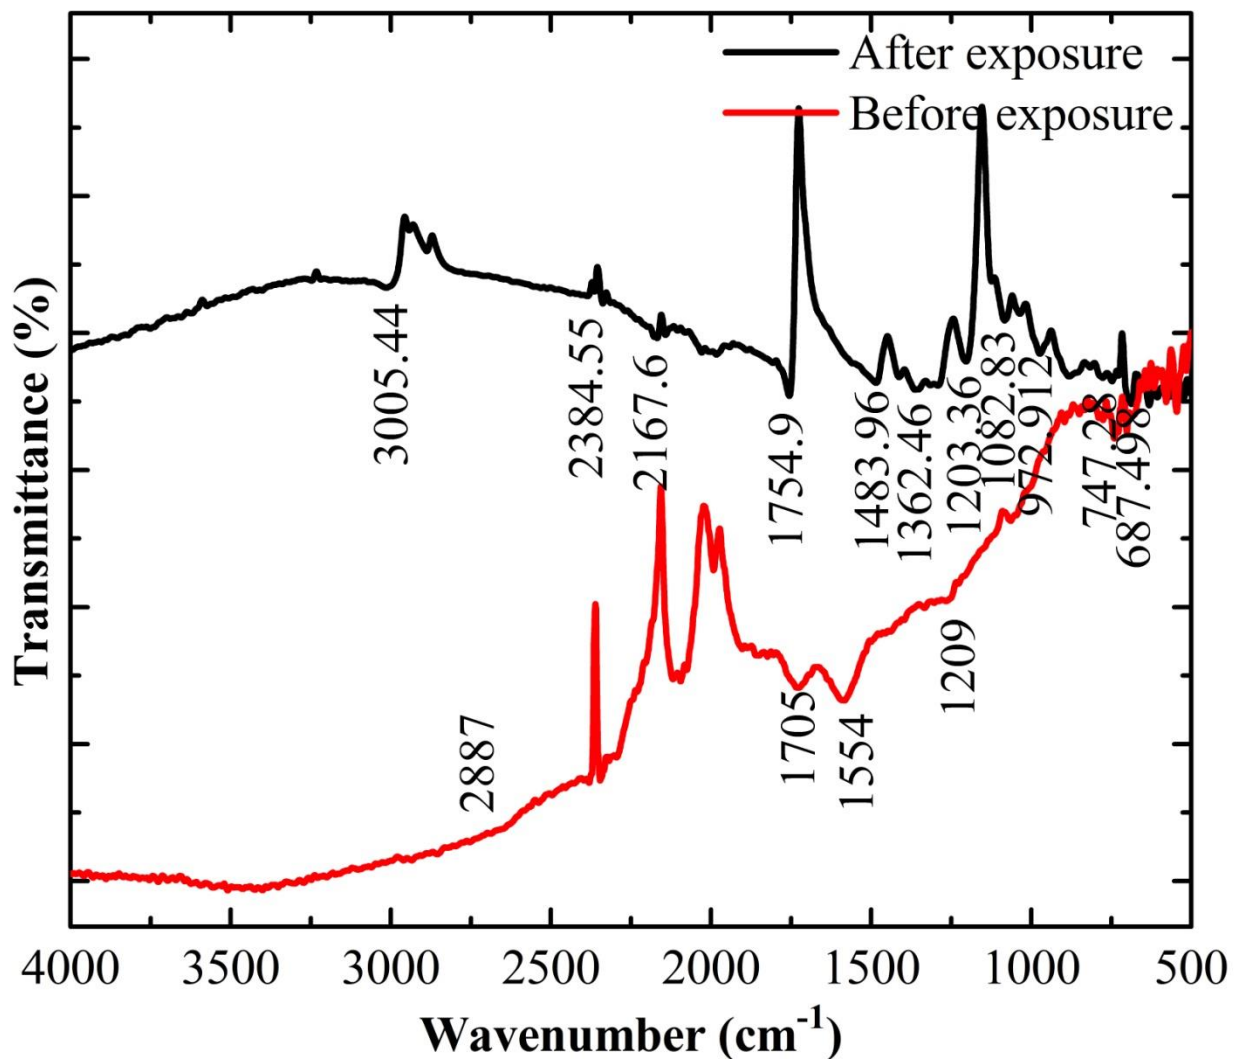

**Figure S1:** FTIR spectra of pure rGO paper before and after ammonia exposure

The FTIR spectra of pure rGO paper before and after exposure of ammonia was shown in Figure S1. The vibration spots of before exposure are marked as that of our previous reports. After exposure of ammonia to the pure sample the adsorption of ammino functional groups [1]  $\text{-N=C=N-}$  stretching vibration at  $2167.6 \text{ cm}^{-1}$ , N-H bending vibration at  $1483.96 \text{ cm}^{-1}$ , C-N stretching vibration at  $1082.83 \text{ cm}^{-1}$  and N-N stretching vibration at  $972.12 \text{ cm}^{-1}$ . The FTIR spectra of  $\text{CeO}_2$ -rGO paper before and after ammonia exposure of ammonia shown in Figure S2. The presence of ceria adsorps more amount of ammonia and the major peaks corresponds to ammonia shifts to higher wavenumber in the given figure. The FTIR spectra of  $\text{SnO}_2$ -rGO paper before and after ammonia exposure of ammonia shown in Figure S3. The tin oxide doped sample

gives the similar kind of adsorption as that of pure rGO paper. The peaks corresponds to the functional groups are marked in the FTIR spectra.

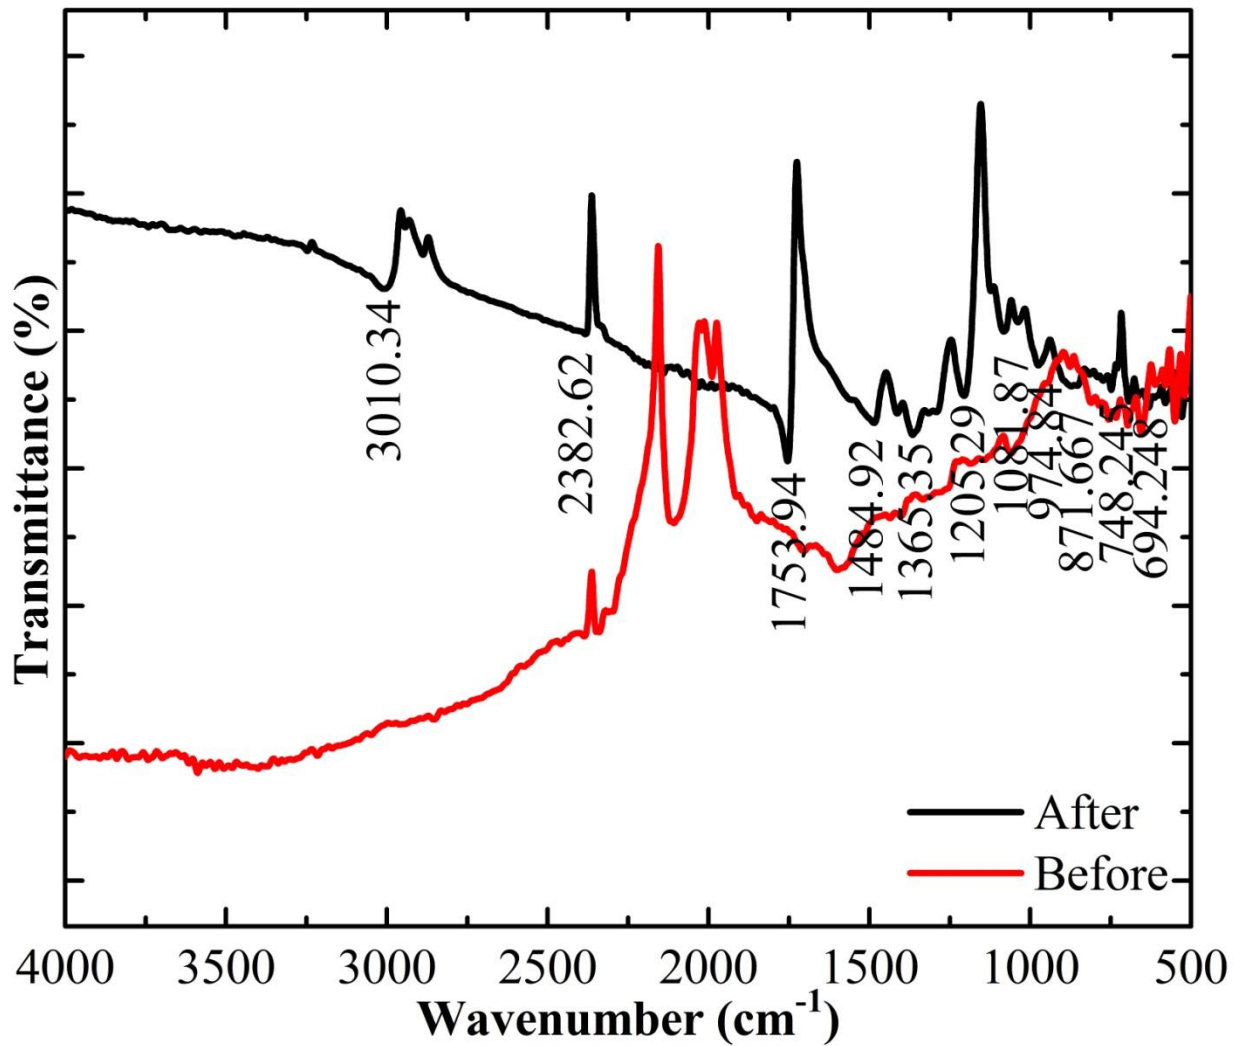

Figure S2: FTIR spectra of CeO<sub>2</sub>-rGO paper before and after ammonia exposure

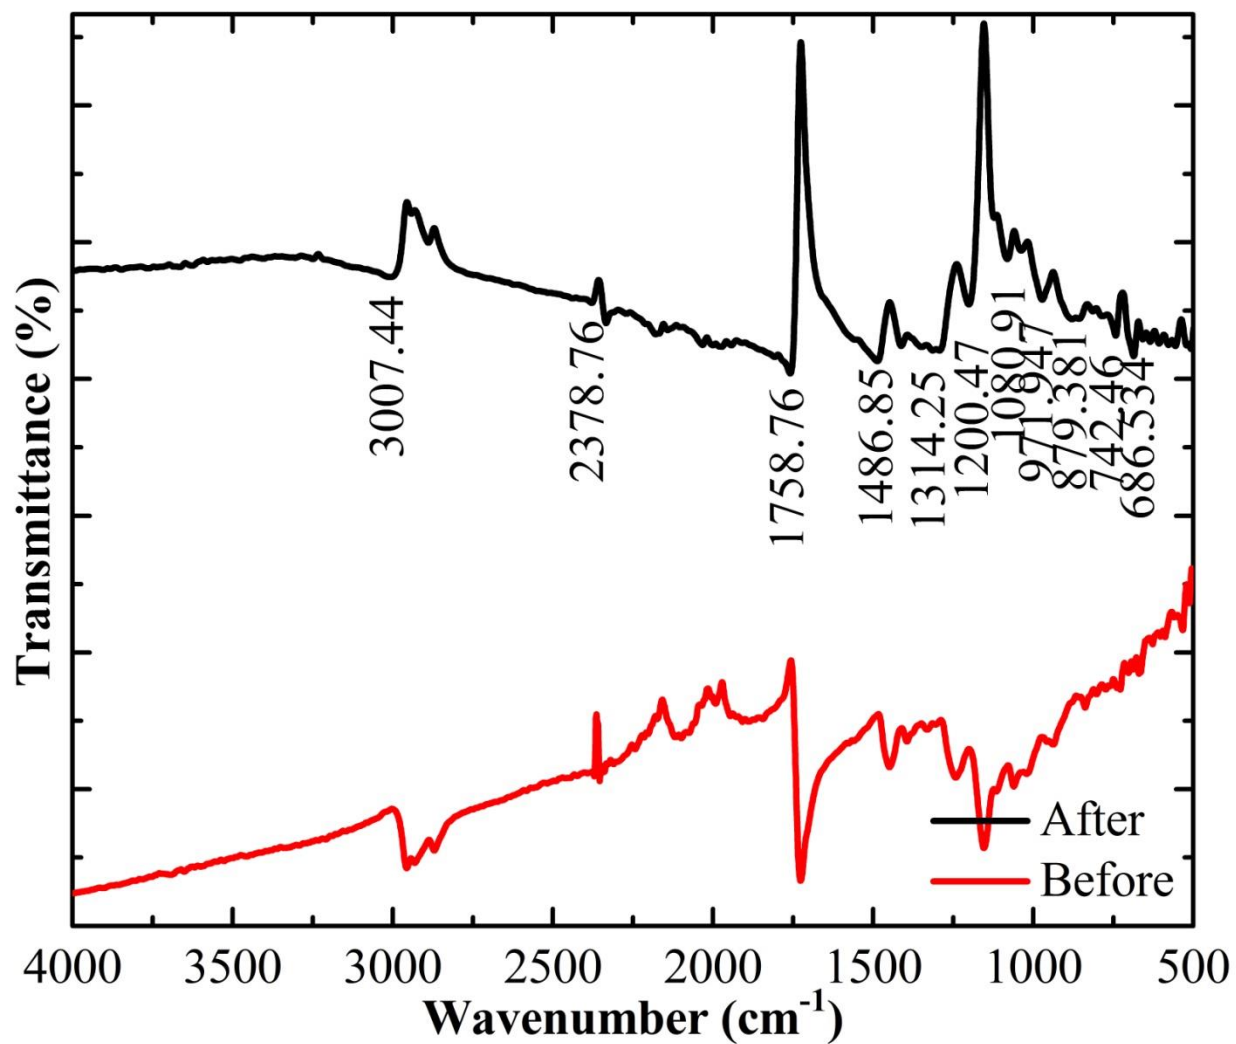

**Figure S3:** FTIR spectra of  $\text{SnO}_2$ -rGO paper before and after ammonia exposure

#### Reference

- [1] T.F. Tahir, A. Salhin and S.A. Ghani, Flow Injection Analysis of Mercury Using 4-Dimethylamino) Benzaldehyde-4-Ethylthiosemicarbazone as the Ionophore of a Coated Wire Electrode, *Sensors* **2012**, 12, 14968-14982.
